# Supplementary material
Source: Springer Nature journal article supplement (https://www.springermedizin.de/resource/supplementary/12974_2010_227_MOESM1_ESM.pdf/9601036)

# 60min MCAO / 48h reperfusion

## infarct volume

## brain swelling

mixed gender

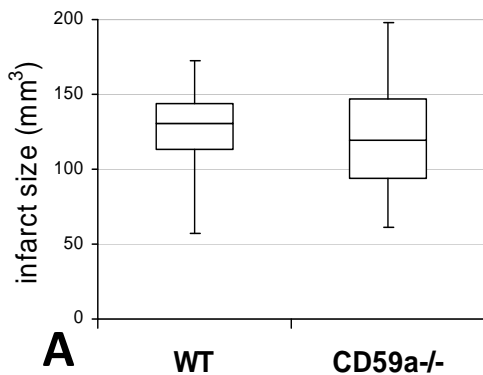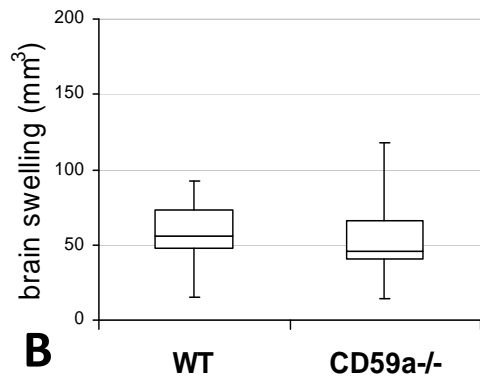

male

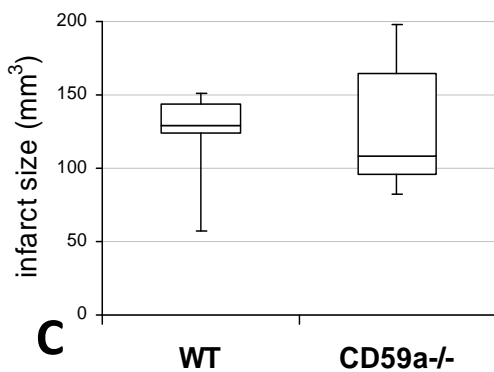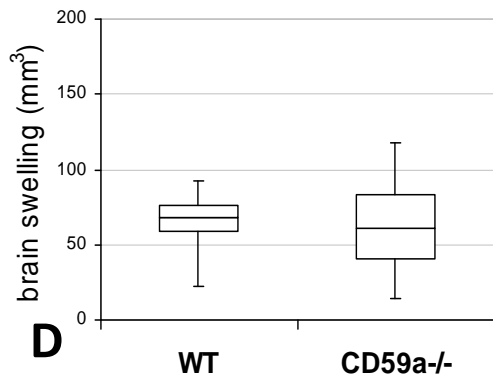

female

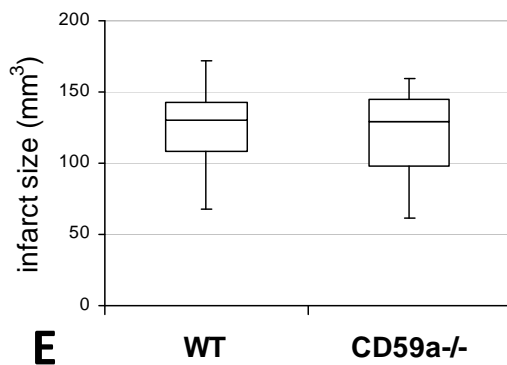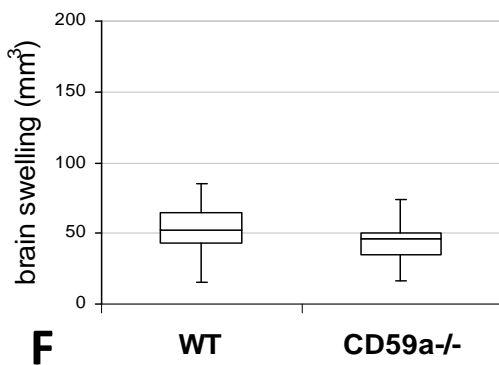

Supplement: MOESM1 [file 9601036]
